# Supplementary material
Source: Springer Nature journal article supplement (https://www.springermedizin.de/resource/supplementary/12911_2011_560_MOESM5_ESM.pdf/9525964)

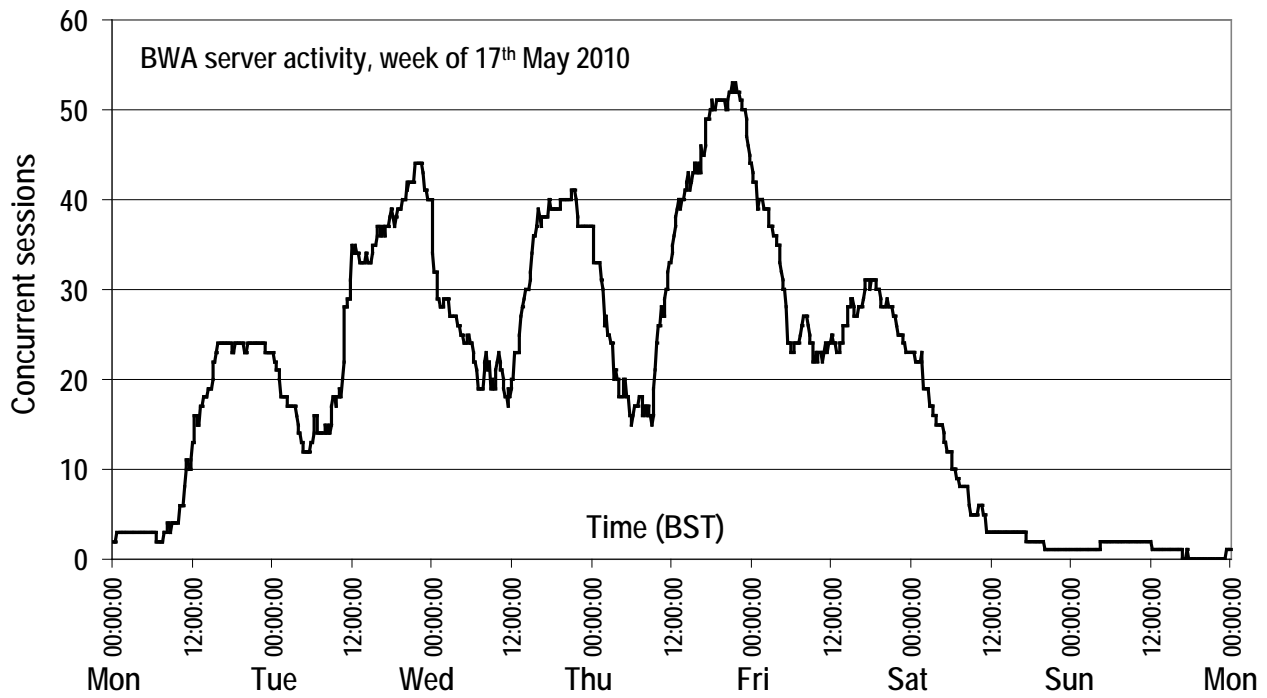

Supplement: MOESM5 [file 9525964]
